# Supplementary material for: Conversion of Racemic Unnatural Amino Acids to Optically Pure Forms by a Coupled Enzymatic Reaction
Source: MDPI journal article supplement (doi:10.3390/molecules26051274), 2021-02-26
Supplement: s1 [file s1]

# Conversion of Racemic Unnatural Amino Acids to Optically Pure Forms by a Coupled Enzymatic Reaction and Its Application to Genetic Code Expansion

Hannae Lee<sup>†</sup>, Dongchan Kim<sup>†</sup>, Sooin Kim and Hyun Soo Lee<sup>\*</sup>

Department of Chemistry, Sogang University, 35 Baekbeomro Mapogu, Seoul 121-742, Korea;  
hannae544@naver.com (H.L.); dongchan94@naver.com (D.K.); sooin27@gmail.com (S.K.)

<sup>\*</sup> Correspondence: hslee76@sogang.ac.kr

<sup>†</sup> These authors contributed equally to this work.

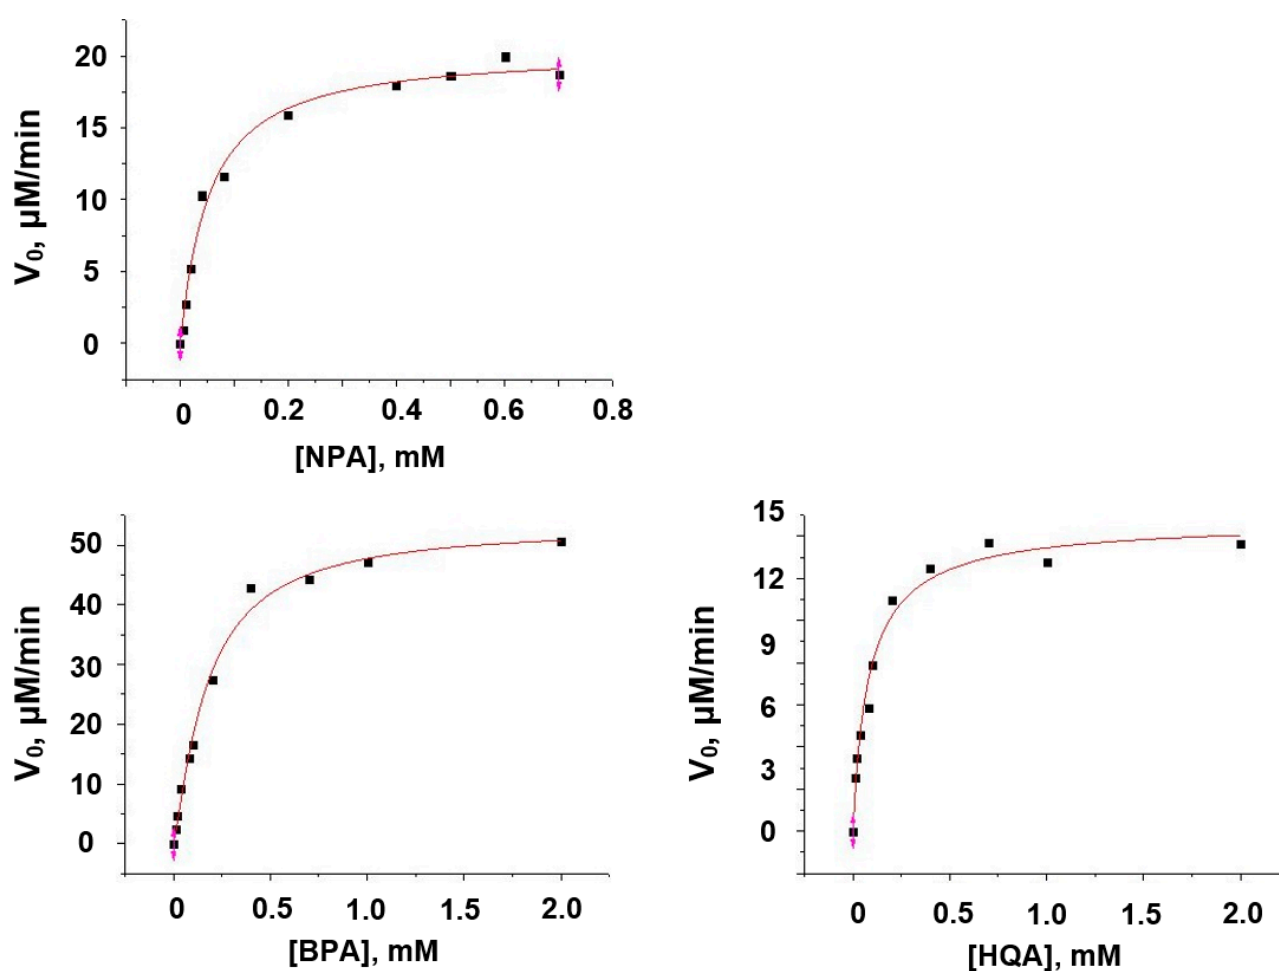

**Figure S1.** Enzyme kinetics of RgDAAO by a peroxidase-coupled enzymatic assay. Conditions: 75 mM phosphate buffer (pH 8.5), 1 mM *o*-dianisidine, 1 U HRP, UAA (indicated concentrations) and RgDAAO (11.9 nM for NPA and 119 nM for BPA and HQA) at 25 °C.

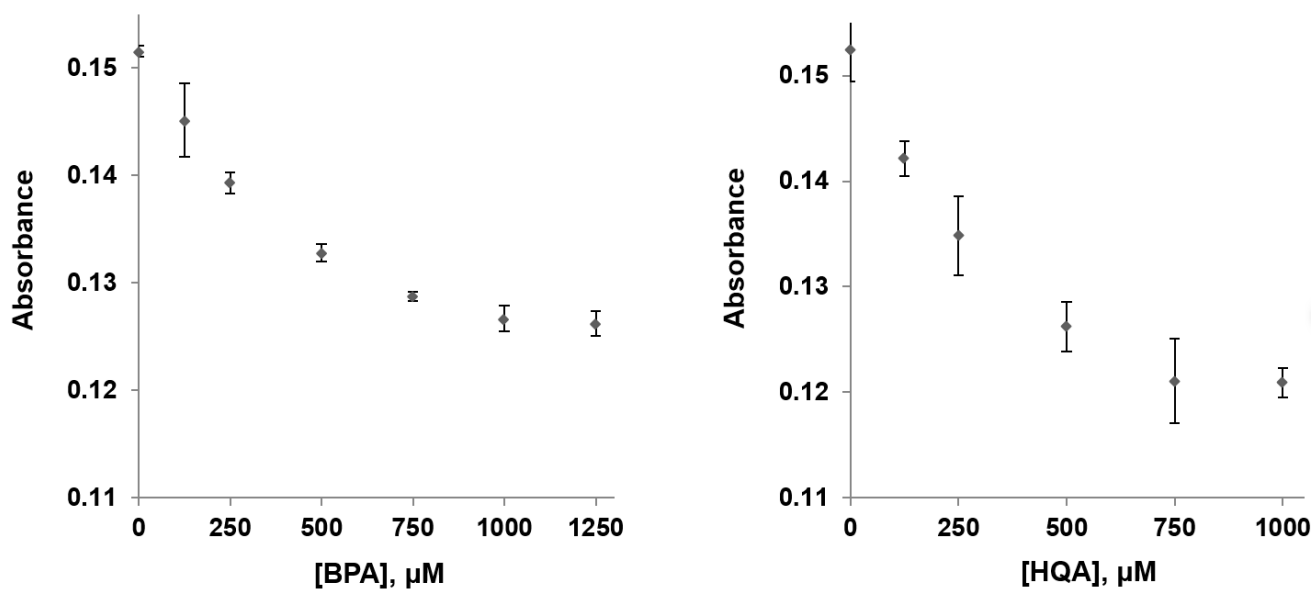

**Figure S2.** TtAT activity for BPA (left) and HQA (right). Conditions: 50 mM HEPES-NaOH (pH 8.0), 0.1 M KCl, UAA (indicated concentrations), and 20  $\mu\text{M}$  TtAT. The reaction mixture was incubated at 25  $^{\circ}\text{C}$  for 5 min, and absorbance was measured at 430 nm.

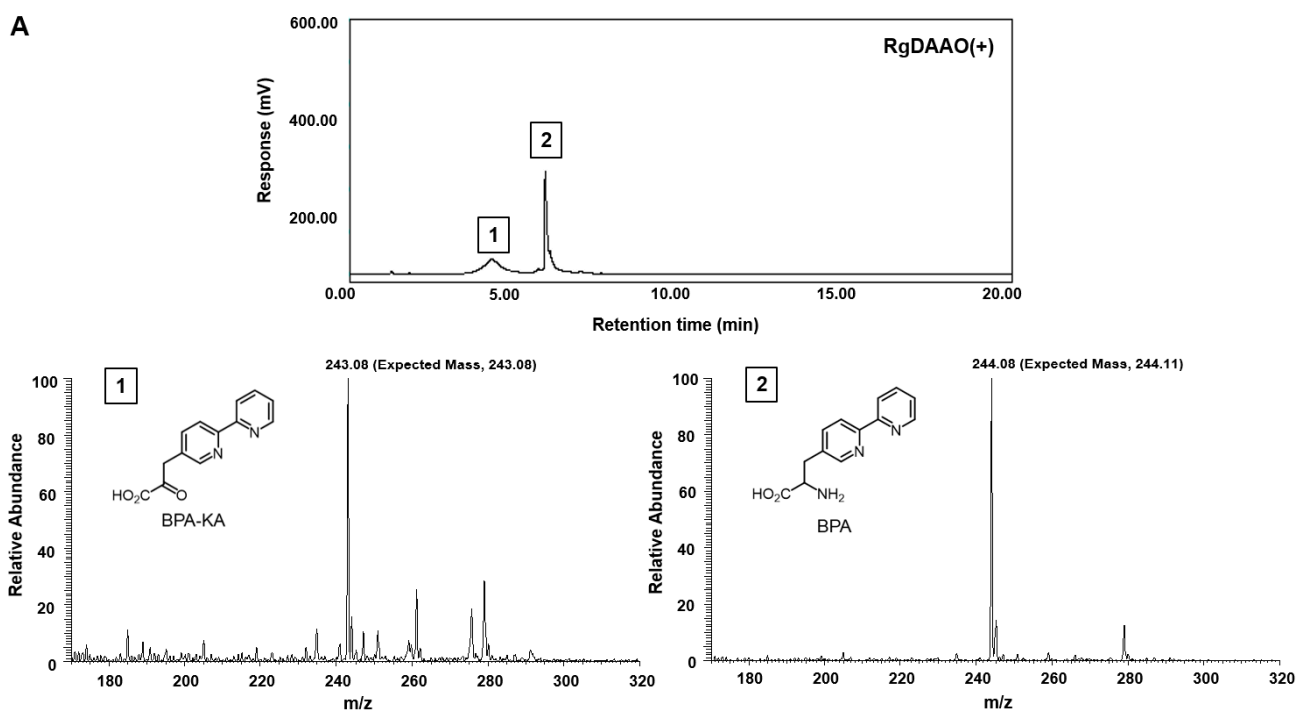

**Figure S3.** LC-MS characterization of the reaction products of racemic BPA (**A**) and HQA (**B**) by RgDAAO. LC traces (280 nm for BPA and 254 nm for HQA) and MS spectra for each peak are shown.

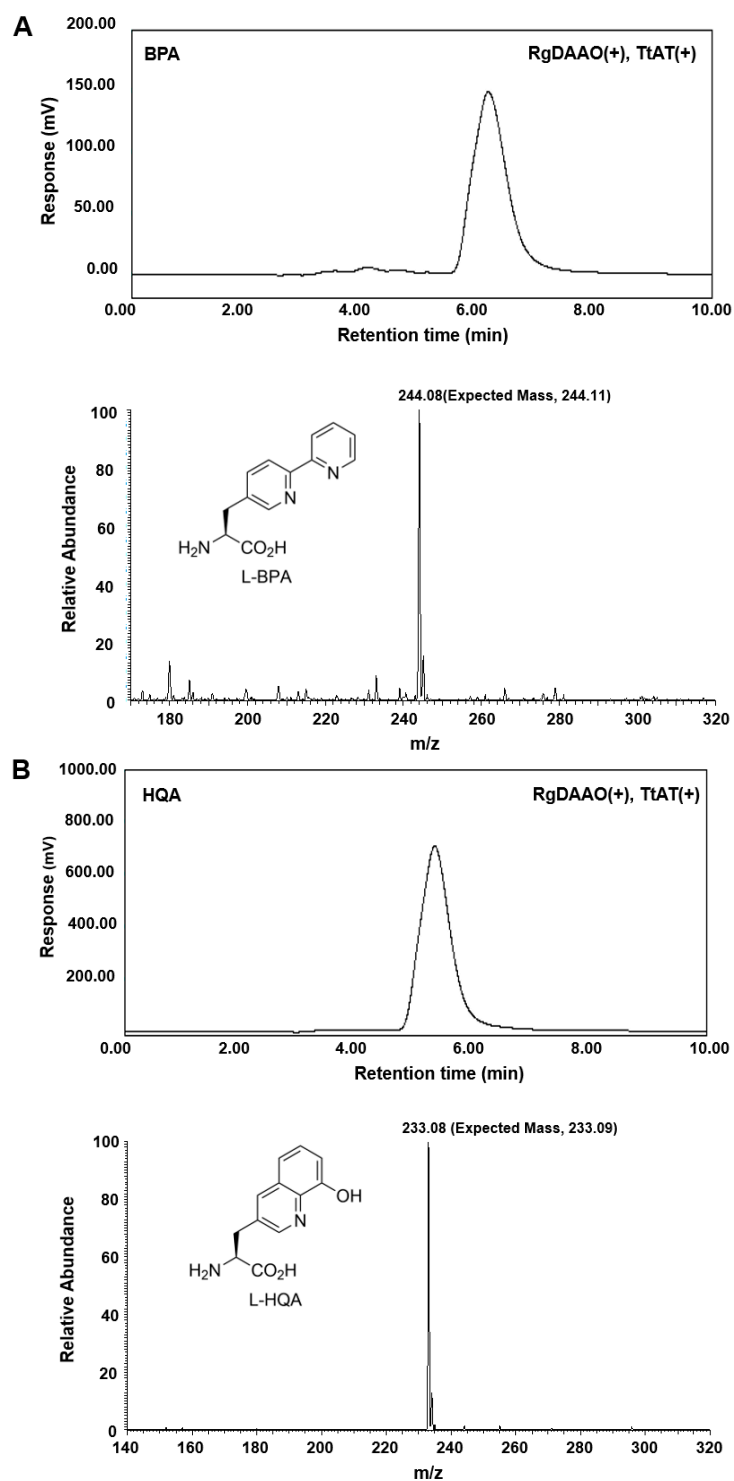

**Figure S4.** LC-MS characterization of the reaction products of racemic BPA (**A**) and HQA (**B**) by the coupled reaction of RgDAAO and TtAT. LC traces (280 nm for BPA and 254 nm for HQA) and MS spectra for each peak are shown.
